# Supplementary material for: Fano resonant Ge2Sb2Te5nanoparticles realize switchable lateral optical force
Source: Royal Society of Chemistry journal article supplement (doi:10.1039/c5nr08804f), 2016-01-01
Supplement: c5nr08804f3.pdf [file c5nr08804f3.pdf]

# Supplementary Information

## Fano resonant Ge<sub>2</sub>Sb<sub>2</sub>Te<sub>5</sub> nanoparticles realize switchable lateral optical force

Tun Cao\*, Libang Mao, Dongliang Gao, Weiqiang Ding, and Cheng-Wei Qiu\*

\*E-mail: [caotun1806@dlut.edu.cn](mailto:caotun1806@dlut.edu.cn) & [eleqc@nus.edu.sg](mailto:eleqc@nus.edu.sg)

### S1. Absorption cross section $C_{abs}$ of the phase-change particles in both amorphous and crystalline states.

The scattering and extinction cross sections of the phase-change nanosphere can be computed from eqn (s1) and (s2), respectively [54]:

$$C_{sca} = \frac{\lambda^2}{\pi} \sum_{n=1}^{\infty} \sum_{m=-n}^{+n} \frac{2n+1}{n(n+1)} \frac{(n+|m|)!}{(n-|m|)!} (|a_n|^2 |g_{n, TM}^m|^2 + |b_n|^2 |g_{n, TE}^m|^2) \quad (s1)$$

$$C_{ext} = \frac{\lambda^2}{\pi} \text{Re} \left[ \sum_{n=1}^{\infty} \sum_{m=-n}^{+n} \frac{2n+1}{n(n+1)} \frac{(n+|m|)!}{(n-|m|)!} (a_n |g_{n, TM}^m|^2 + b_n |g_{n, TE}^m|^2) \right] \quad (s2)$$

where  $C_{sca}$  is scattering cross section and  $C_{ext}$  extinction cross section, and the absorption cross section  $C_{abs}$  of the particle is given by eqn (s3).

$$C_{abs} = C_{ext} - C_{sca} \quad (s3)$$

Figure S1 shows the peak of  $C_{abs}$  shifts towards the shorter wavelength (from 660 to 600nm) when the phase of Ge<sub>2</sub>Sb<sub>2</sub>Te<sub>5</sub> switches from amorphous to crystalline. However, a difference of the  $C_{abs}$  between the amorphous and crystalline particle is not large around  $\lambda = 640$  nm, where  $C_{abs} = 2.2 \times 10^{-13} \text{ m}^2$  for the amorphous and  $C_{abs} = 1.4 \times 10^{-13} \text{ m}^2$  for the crystalline. This indicates a small difference in the absorptivity of the phase-change particles in amorphous and crystalline states. Moreover, the phase-change nanoparticles are manipulated by a Gaussian pulse with a very low power intensity ( $\sim 10 \text{ mW}/\mu\text{m}^2$ ) and have the cooling effect owing to the convection in the aqueous environment. Therefore, herein the optical heating may not significantly disturb the optical parameters of the phase-change particles.

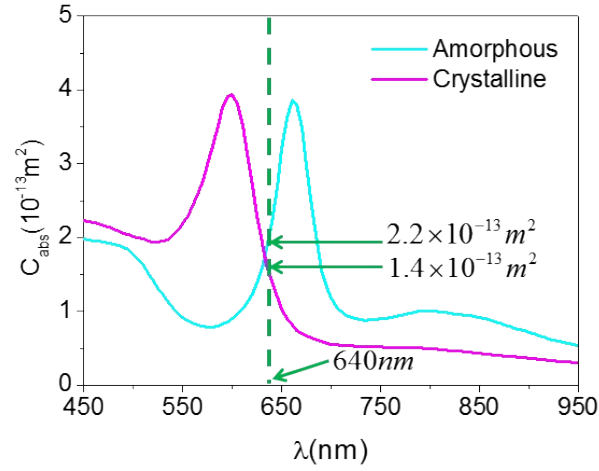

Fig. S1 Absorption cross section  $C_{abs}$  for the crystalline (shown by the pink solid line) and amorphous nanoparticle (shown by the cyan solid line). The nanoparticles are in the water environment.

## S2. Optimization of the radius of $\text{Ge}_2\text{Sb}_2\text{Te}_5$ core ( $R_{PCM}$ ) and the thickness of Au shell ( $T_{Au}$ ).

The total lateral force  $F_x$  originating from the dipole-quadrupole Fano resonance (DQ-FR) closely relates to the thickness of the Au shell ( $T_{Au}$ ) owing to the strong coupling between the outer and inner surface of the shell. In Fig.S2, we investigate the  $F_x$  acted on the phase-change nanoparticles with Au shell (thickness  $T_{Au} = 10, 20, 30$  and  $40$  nm) and crystalline  $\text{Ge}_2\text{Sb}_2\text{Te}_5$  core ( $R_{PCM} = 70$  nm), where the particles located at half waist of the Gaussian beam ( $x = w_0/2$ ). As can be seen, the dip of  $F_x$  induced by the DQ-FR appears at  $\lambda = 688, 620, 618,$  and  $632$  nm for  $T_{Au} = 10, 20, 30,$  and  $40$  nm, accordingly. Quality ( $Q$ ) factor is defined by the resonant frequency ( $\omega_0$ ) over the line-width of the autoionized states ( $\gamma$ ), where  $\omega_0$  and  $\gamma$  are obtained from Fano formula (eqn (1)) by fitting  $F_x$  curves shown in Fig.S2. The fitting parameters are presented in Table S1.

$$I_{\text{Fano}} = I_0 \frac{1}{1 + \Gamma^2} \frac{(\Gamma\gamma + \omega - \omega_0)}{(\omega - \omega_0)^2 + \gamma^2} + I_b \quad (1)$$

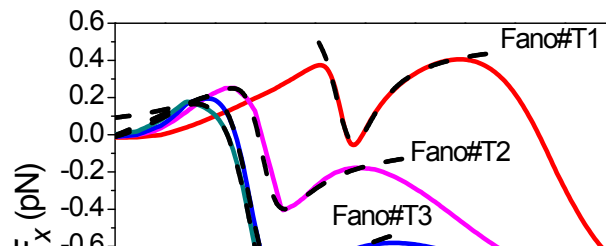

Fig. S2 Fano fitting on the  $F_x$  spectra for the crystalline particle with various Au shell thicknesses ( $T_{Au}= 10,20,30$  and  $40$  nm) and a fixed radius of crystalline  $\text{Ge}_2\text{Sb}_2\text{Te}_5$  core ( $R_{PCM}=70\text{nm}$ ).

In Table S1, it can be seen that  $Q$  factor of the DQ-FR induced  $F_x$  reduces with increasing  $T_{Au}$ . The sharpest resonant dip of the  $F_x$  curve is observed at  $\lambda = 688$  nm for  $T_{Au}= 10$  nm, where  $\gamma$  is  $1.05 \times 10^{14}$  rad/s, and  $Q$  factor 26.38. However, considering its practical application, here we choose  $T_{Au}= 20$  nm exhibiting the second strongest  $Q$  factor of 23.26 since its resonant wavelength of the DQ-FR ( $\lambda = 620$  nm) is close to the commonly used laser:  $\lambda = 633$  nm.

Table S1. Parameters used in the FR line shape to fit the  $F_x$  spectra for phase-change nanoparticle with Au shell (thickness  $T_{Au}= 10,20,30$  and  $40$  nm) and crystalline  $\text{Ge}_2\text{Sb}_2\text{Te}_5$  core ( $R_{PCM}=70\text{nm}$ ).

| Lable           | $\omega_0$            | $\gamma$              | $\Gamma$ | $I_0$  | $I_b$    | $Q$   |
|-----------------|-----------------------|-----------------------|----------|--------|----------|-------|
| <b>Fano #T1</b> | $2.77 \times 10^{15}$ | $1.05 \times 10^{14}$ | 0.3354   | 0.6499 | -0.04242 | 26.38 |
| <b>Fano #T2</b> | $3.14 \times 10^{15}$ | $1.35 \times 10^{14}$ | 0.75     | 0.65   | -0.4     | 23.26 |
| <b>Fano #T3</b> | $3.21 \times 10^{15}$ | $2.1 \times 10^{14}$  | -1.228   | -1.039 | 0.2035   | 15.3  |
| <b>Fano #T4</b> | $3.17 \times 10^{15}$ | $2.74 \times 10^{14}$ | -1.388   | -1.352 | 0.1659   | 11.57 |

Figure S3 shows the comparison of  $F_x$  between the amorphous and crystalline nanoparticles located at  $x = w_0/2$  for various core radius  $R_{PCM}=50,60,70$  and  $80$  nm with a fixed Au shell thickness of  $T_{Au}=20$  nm. The switchable feature of  $F_x$  becomes more significant as increasing  $R_{PCM}$ . Figure S3(d) shows the  $F_x$  can obtain the highest transition from  $+0.27$  to  $-0.56$  pN for  $R_{PCM}=80$  nm at  $\lambda = 680$  nm. However, this transition appearing at  $\lambda = 680$  nm is beyond the spectra of the commonly used laser ( $\lambda = 633$  nm). In terms of the experimental realization, we optimized the radius of  $\text{Ge}_2\text{Sb}_2\text{Te}_5$  core at  $R_{PCM}=70$  nm which possesses the largest transition of  $F_x$  (from  $+0.14$  to  $-0.34$  pN) at  $\lambda = 640$  nm.

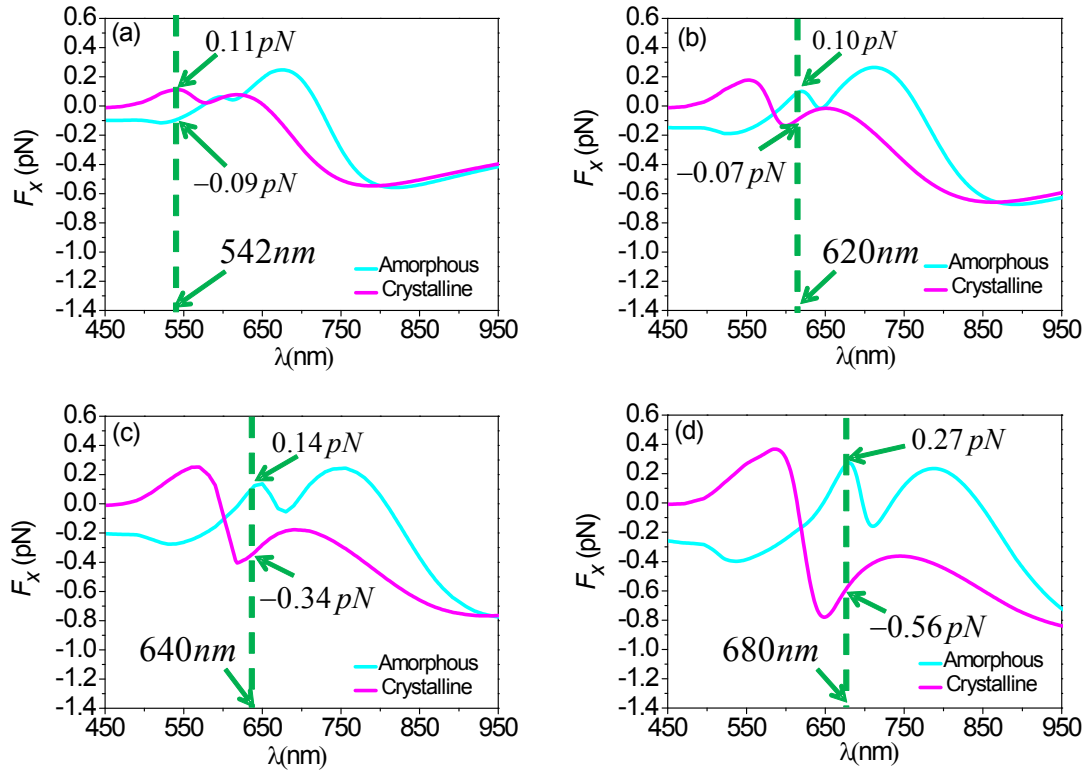

Fig. S3  $F_x$  for both the crystalline nanoparticle shown by the pink solid line and amorphous nanoparticle shown by the cyan solid line with (a)  $R_{PCM}=50$  nm, (b)  $R_{PCM}=60$  nm, (c)  $R_{PCM}=70$  nm, (d)  $R_{PCM}=80$  nm, where the Au shell thickness is fixed at  $T_{Au}=20$  nm and the nanoparticles are both bonded by PSS in the water environment.

### S3. Dynamical simulation of stability for the phase-change particle under lateral optical force.

For the phase-change particles with random Brownian motion in aqueous environment, it is necessary to analyse its stability. The phase-change particle's motion is modeled by the Langevin equation [60-61]

$$\frac{d^2x(t)}{dt^2} = -\frac{\beta}{m} \frac{dx(t)}{dt} + \frac{\zeta}{m} W_x(t) + \frac{F_x(x,y)}{m} \quad (s4)$$

$$\frac{d^2y(t)}{dt^2} = -\frac{\beta}{m} \frac{dy(t)}{dt} + \frac{\zeta}{m} W_y(t) + \frac{F_y(x,y)}{m} \quad (s5)$$

where  $x(t)$  and  $y(t)$  are the particle's positions,  $F_x(x,y)$  and  $F_y(x,y)$  are the lateral forces,  $W_x(t)$  and  $W_y(t)$  are the stochastic noise terms that model random collisions from fluid molecules along both the  $x$ -axis and  $y$ -axis respectively,  $m$  the mass of the spheres,  $\beta = 6\pi\eta(R_{PCM} + T_{Au})$  the drag coefficient (from Stoke's law for a spherical particle),  $\eta = 0.89mPa \cdot s$  the viscosity of water. The scaling constant for the stochastic noise term is given by  $\zeta = \sqrt{2\beta k_B T}$  where  $k_B$  is Boltzmann's constant and  $T = 300K$ . The simulation algorithm was run for a total of 2500 000 time-steps with a very short time-step of 1 ns.

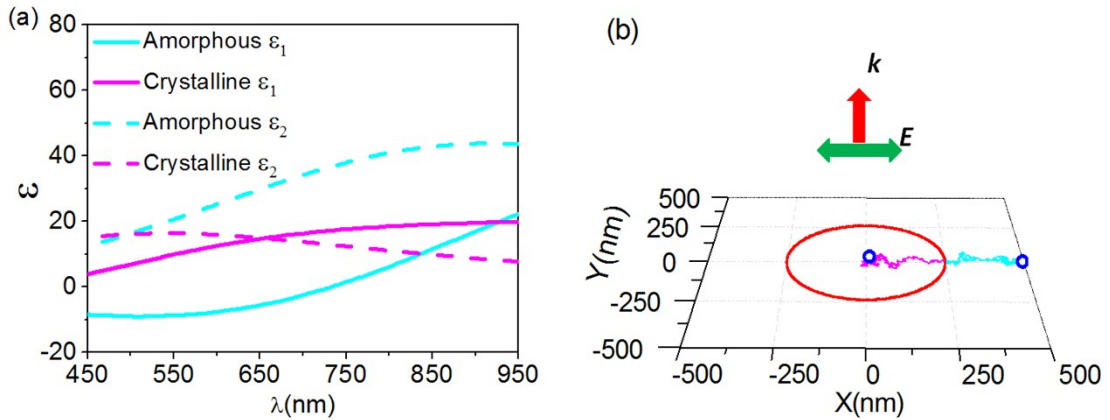

Fig. S4 (a) Dielectric constant  $\epsilon_1(\omega)$  and  $\epsilon_2(\omega)$  vs wavelength for both amorphous and

crystalline phases of  $\text{Ge}_2\text{Sb}_2\text{Te}_5$ . (b) Observations of stability for the phase-change particle under lateral optical force. The pink and cyan solid lines present the 2.5 ms trajectories of the crystalline and amorphous spheres of  $R_{PCM} = 70$  nm and  $T_{Au} = 20$  nm, accordingly. The particles are illuminated by a Gaussian beam with a low incident power  $P_0 = 10$  mW. The ends of trajectories are indicated by small blue circles and the red solid ring denotes the illumination spot of the Gaussian beam in the focal plane ( $z = 0$  plane). The wave vector and polarization are indicated by red and green arrows. The spheres are initially placed off-axis in a Gaussian beam ( $x = w_0/2 = 250$  nm) and bonded by PSS in the water environment.

The real,  $\varepsilon_1(\omega)$  and imaginary,  $\varepsilon_2(\omega)$  parts of the dielectric function for the different states of  $\text{Ge}_2\text{Sb}_2\text{Te}_5$  were obtained from the published Fourier transform infrared spectroscopy data in [45], which for the visible spectral range are shown in Fig. S4(a). In Fig. S4 (b), we dynamically simulated the stability of the nanoparticles by observing time sequences of the movements of phase-change spheres ( $R_{PCM} = 70$  nm,  $T_{Au} = 20$  nm) for amorphous and crystalline states in the focal plane of the Gaussian beam ( $z = 0$  plane), where the particle in two dimensions ( $x$ - $y$  plane) is tracked with nanometer precision. The beam waist of the Gaussian beam is  $w_0 = 500$  nm and the power of the beam is  $P_0 = 10$  mW. Both of the situations are excited at  $\lambda = 640$  nm. A 2.5 ms trajectory of the crystalline sphere is shown in the pink solid line. Owing to the excitation of the DQ-FR, a lateral scattering force ( ${}^sF_x$ ) is generated along the  $-x$  axis (see Fig. 2(d)) and, combined with the gradient force ( $F_{grad}$ ) towards the center of the Gaussian source, this results in a negative  $F_x$  and thus causes a motion of the crystalline particle to the center of the incident light (Supplementary Movie\_S1\_crystalline). In contrast, within illumination by the Gaussian beam, the amorphous nanoparticle follows opposite direction of motion (see cyan solid line). This is due to the asymmetrical scattering in the  $x$ - $z$  plane (see Fig. 2(c)), where the  ${}^sF_x$  generated along the  $+x$  axis is larger than the  $F_{grad}$  hence pushing the amorphous particle away the beam center (Supplementary Movie Movie\_S2\_amorphous). As can be seen in both Fig. S4(b) and supplementary movies, the phase-change nanoparticles only thermally fluctuate from  $-58$  to  $51$  nm for the crystalline and from  $-35$  to  $60$  nm for the amorphous along the  $y$ -axis, which would not significantly affect the lateral sorting of the spheres along the  $x$ -axis.

- [45] K. Shportko, S. Kremers, M. Woda, D. Lencer, J. Robertson, and M. Wuttig, *Nat. Mater.*, 2008,**7**, 653-658.
- [54] G. Gouesbet, B. Maheu, and G. Grehan, *J. Opt. Soc. Am. A*, 1988,**5**, 1427-1443.
- [60] P. Langevin, *C. R. Acad. Sci. Paris*, 1908,**146**, 530.
- [61] P. Hansen, Y. Zheng, J. Ryan, and L. Hesselink, *Nano Lett.*, 2014,**14**, 2965.
